# Supplementary material
Source: PubMed Central journal article supplement (PMC2940950)
Supplement: NIHMS226891-supplement-1.pdf [file NIHMS226891-supplement-1.pdf]

**A** U87MG (Reduced)

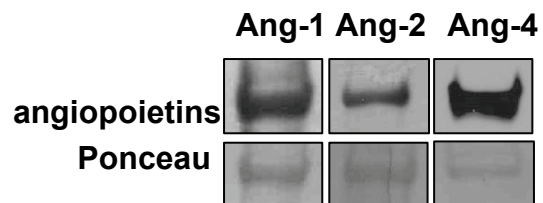

**B** Ang-4 (Non-Reduced)

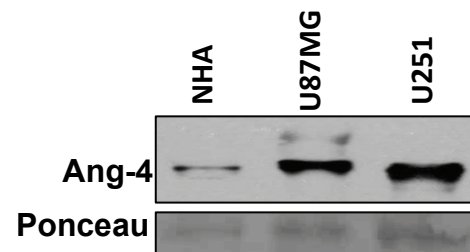

Brunckhorst\_Supplemental Fig 1

**A. Cell proliferation assay:**

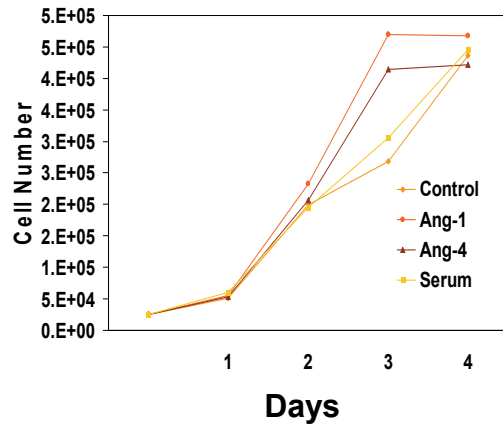

**B. Cell survival assay:**

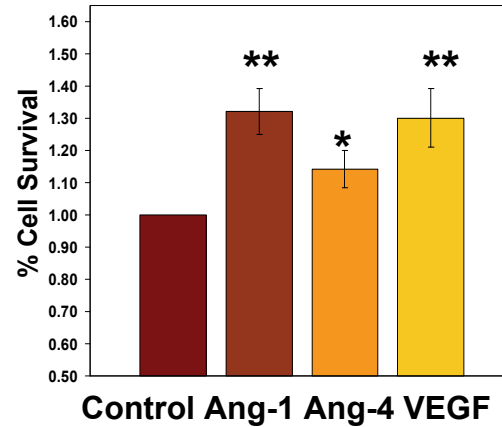

**C. Wound healing/migration assay:**

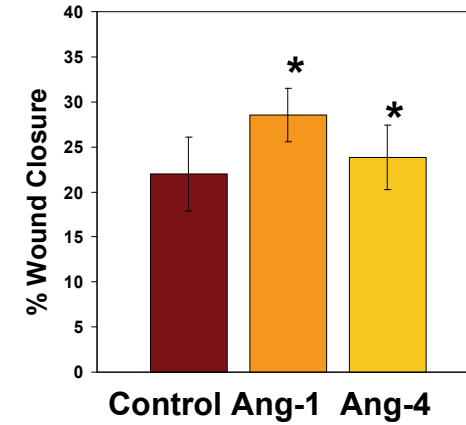

**D. Tubulogenesis Assay:  
Branching points:**

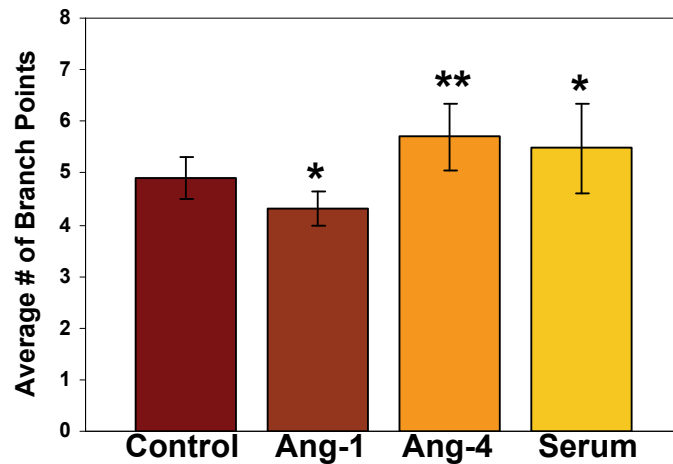

**Branch length:**

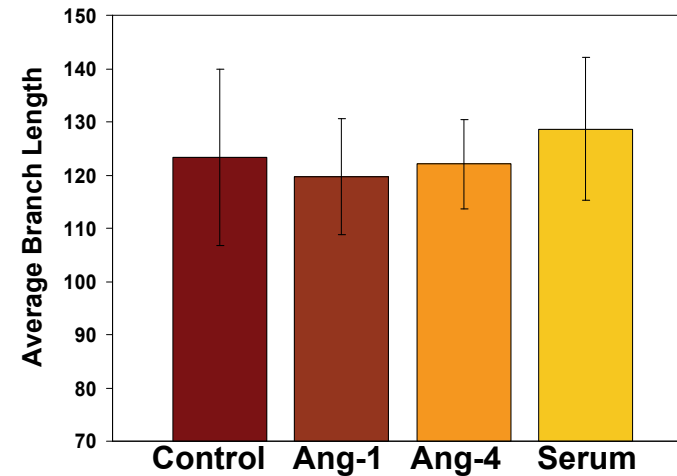

**Brunckhorst\_Supplemental Fig 1**

**Supplemental Figure 1. Expression of angiopoietins by GBM cells:** Endogenous Ang-1, Ang-2, and Ang-4 secreted by U87MG cells (**A**) and endogenous Ang-4 produced by NHAs, U251, and U87MG (**B**) were detected by western blotting with anti-Ang-1 (R&D), Ang-2 (Santa Cruz), or Ang-4 (R&D) antibodies. The SDS-PAGEs were run either under reducing conditions (**A**) or non-reducing conditions (**B**). 160µg of proteins from concentrated serum-free cell culture media was loaded in each lane. The intensities of ~50kDa ponceau-stained bands on the transferred membranes were used as the controls for protein loading and transferring efficiency.

**Supplemental Figure 2. The effects of Ang-4 on endothelial cell proliferation, survival, migration, and tubulogenesis assays:** endothelial cell proliferation (**A**) survival (**B**), migration (**C**), and tubulogenesis (**D**) assays were performed in the presence or absence of 200ng/ml of Ang-1 or Ang-4, 20ng/ml of VEGF, or 10%FBS.
